# Supplementary material for: Toward rapid aqueous RAFT polymerization of primary amine functional monomer under visible light irradiation at 25 °C
Source: Royal Society of Chemistry journal article supplement (doi:10.1039/c2py20810e), 2012-11-03
Supplement: c2py20810e.pdf [file c2py20810e.pdf]

# Toward Rapid Aqueous RAFT Polymerization of Primary Amine Functional Monomer under Visible Light Irradiation at 25 °C

Guhuan Liu<sup>a</sup>, Hui Shi<sup>a</sup>, Yuru Cui<sup>a</sup>, Jianyu Tong<sup>a</sup>, Ying Zhao<sup>b</sup>, Dujin Wang<sup>b</sup>, and Yuanli Cai<sup>\*,a</sup>

## Electronic Supplementary Information

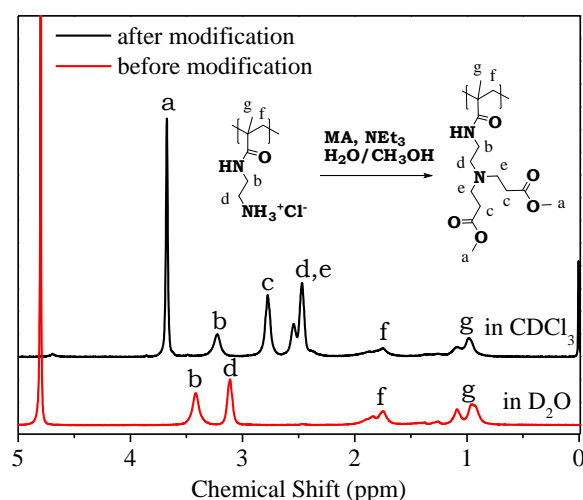

**Figure S1.** <sup>1</sup>H NMR spectra of PAEMA and the corresponding polymer whose primary amines were fully converted to tertiary amines via reacting with methyl acrylate (MA).

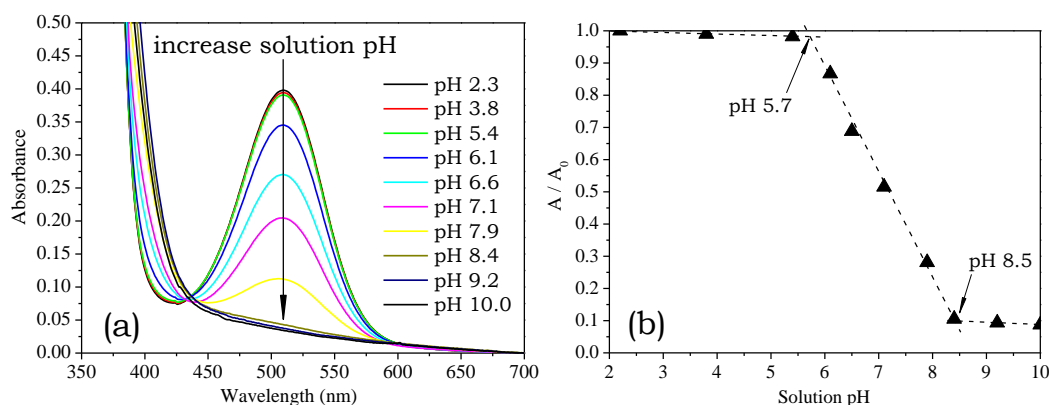

**Figure S2.** (a) UV-vis spectra of 5.0 wt% PAEMA in the solution of methanol and water (70:30 wt/wt) at various pH values over 2.3-10.0 and stirred at 25 °C for 15 h; (b) The variation of absorbance at  $\lambda_{\max,CTP} = 510$  nm as a function of pH values, where  $A_0$  and  $A$  are separately the absorbance at  $\lambda_{\max,CTP} = 510$  nm of the initial solution and after stirring for 15 h.
